# Supplementary material
Source: PubMed Central journal article supplement (PMC4342104)

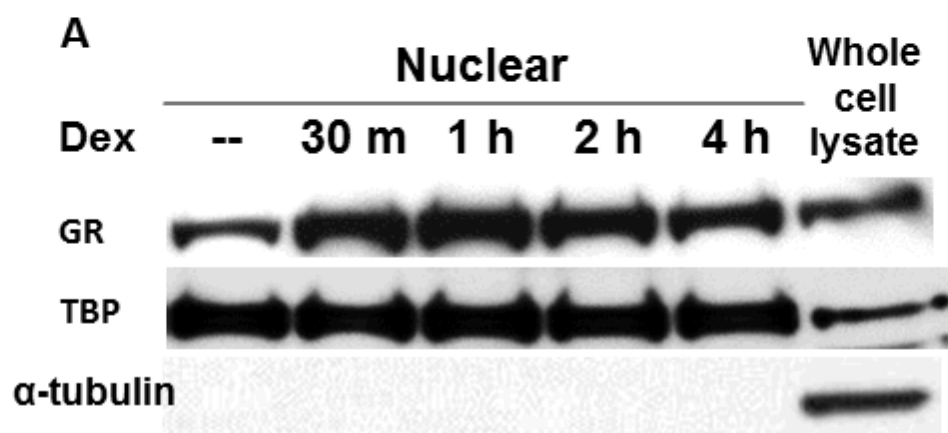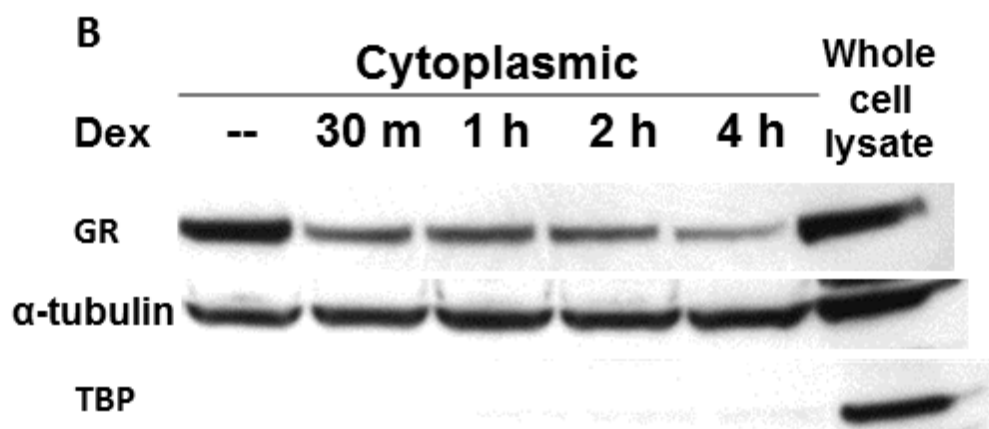

Figure E2

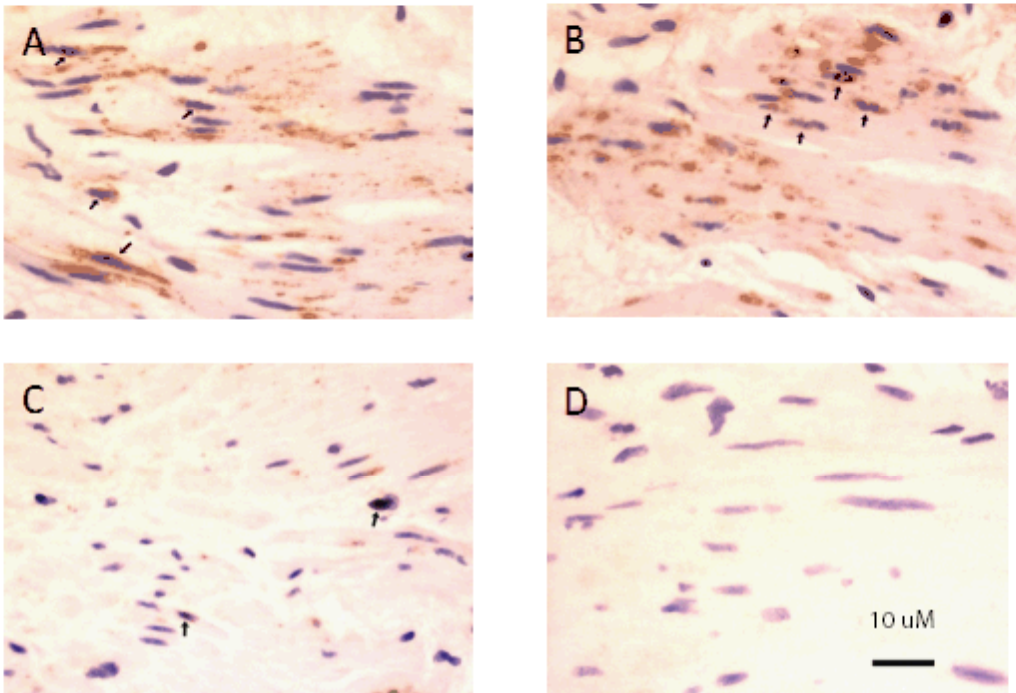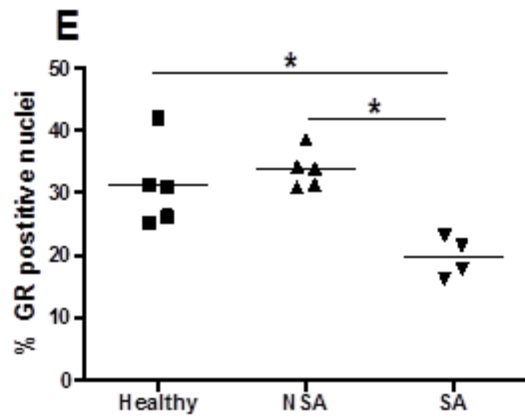

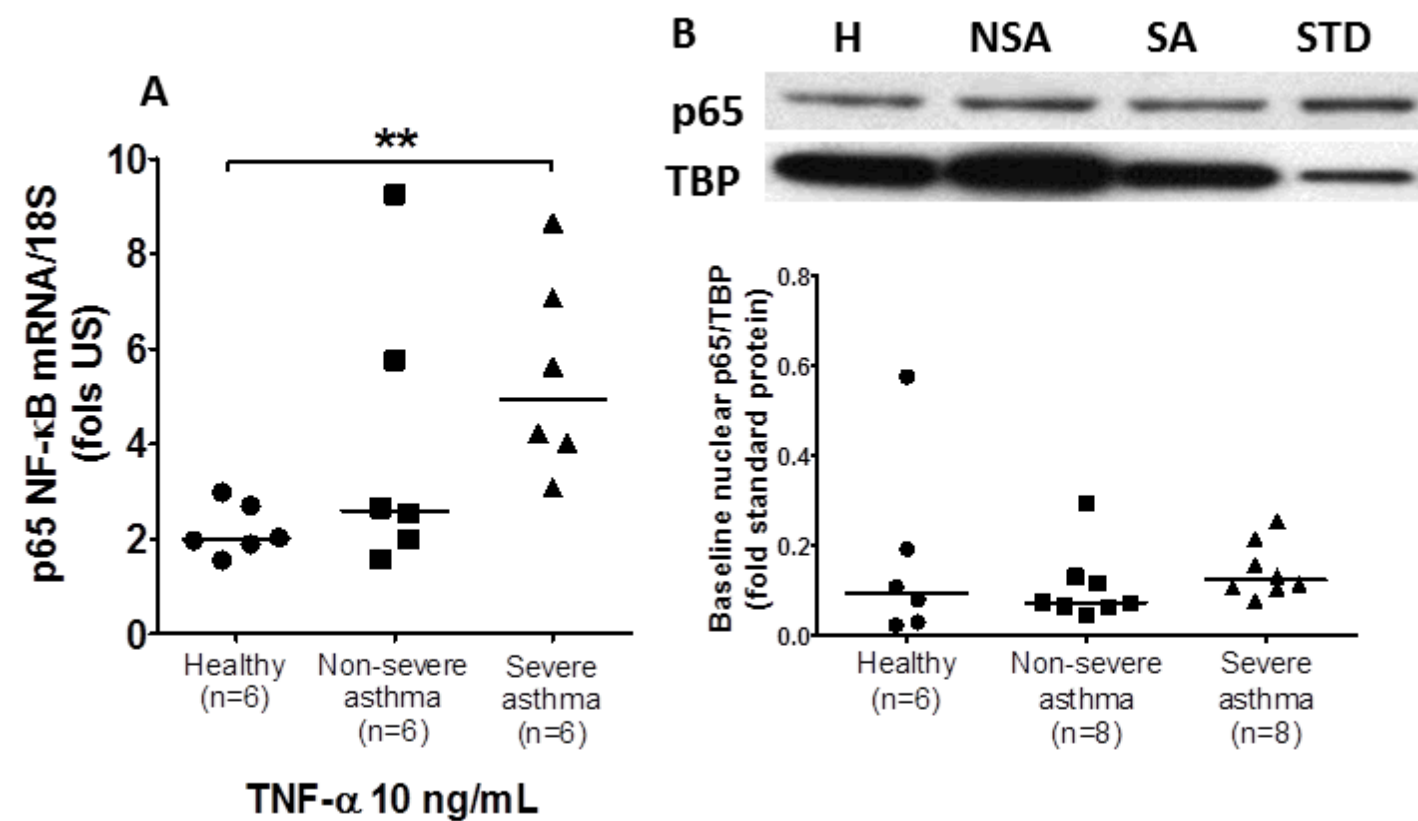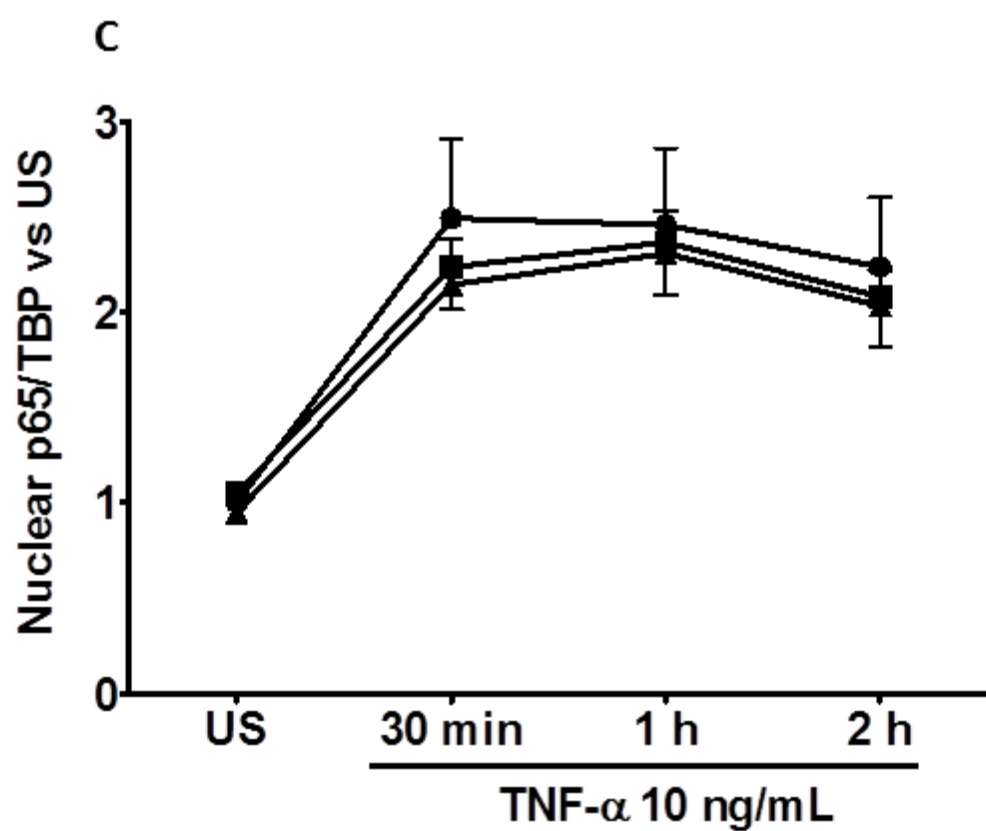

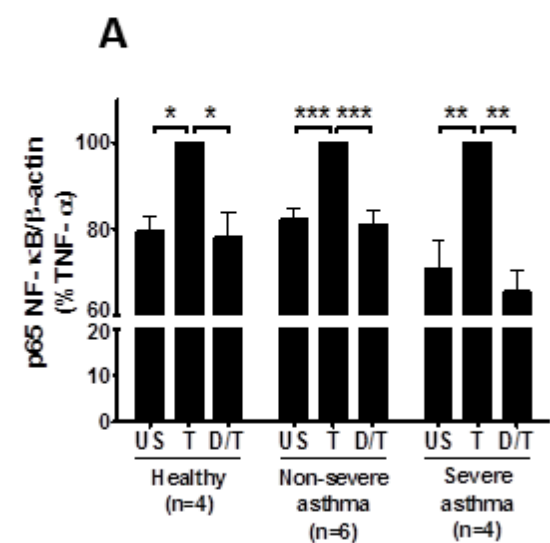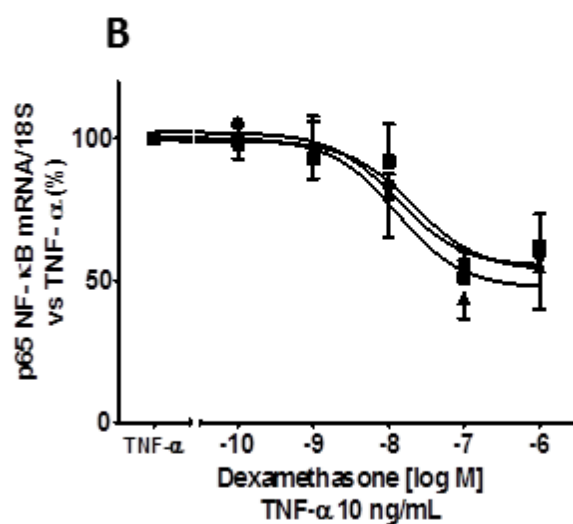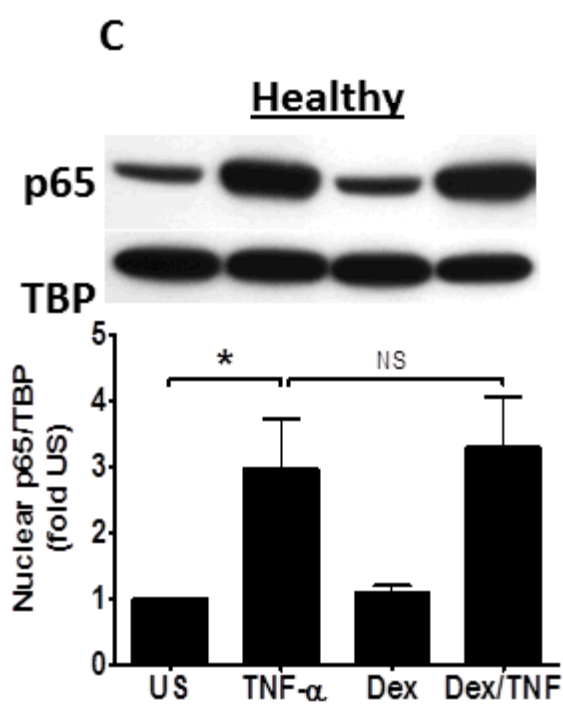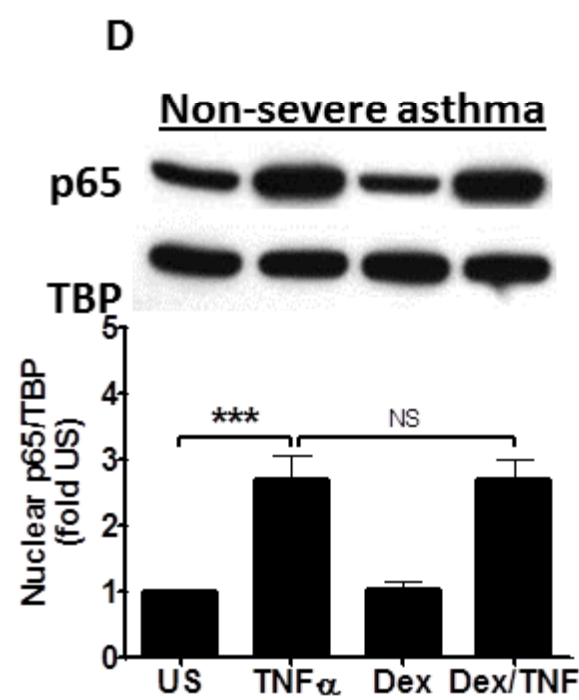

Supplement: NIHMS62132-supplement-02.pdf [file NIHMS62132-supplement-02.pdf]
